# Supplementary material for: Role of hyaluronan in regulating self-renewal and osteogenic differentiation of mesenchymal stromal cells and pre-osteoblasts
Source: PubMed Central journal article supplement (PMC7544712; doi:10.1007/s00784-020-03259-8), 2020-03-31
Supplement: 784_2020_3259_MOESM1_ESM.pdf [file 784_2020_3259_MOESM1_ESM.pdf]

**Electronic Supplementary Material for:**

**Role of hyaluronan in regulating self-renewal and osteogenic differentiation of mesenchymal stromal cells and pre-osteoblasts**

**Maria B. Asparuhova<sup>1,2,3\*</sup>, Vivianne Chappuis<sup>2</sup>, Alexandra Stähli<sup>3</sup>, Daniel Buser<sup>2</sup>, Anton Sculean<sup>3</sup>**

<sup>1</sup>Laboratory of Oral Cell Biology, Dental Research Center, School of Dental Medicine, University of Bern, Freiburgstrasse 3, 3010 Bern, Switzerland

<sup>2</sup>Department of Oral Surgery and Stomatology, School of Dental Medicine, University of Bern, Freiburgstrasse 7, 3010 Bern, Switzerland

<sup>3</sup>Department of Periodontology, School of Dental Medicine, University of Bern, Freiburgstrasse 7, 3010 Bern, Switzerland

**\*Corresponding author:** Maria B. Asparuhova  
Laboratory of Oral Cell Biology  
School of Dental Medicine, University of Bern  
Dental Research Center, a platform of sitem-insel  
Freiburgstrasse 3, CH-3010 Bern, Switzerland  
Tel: +41 31 632 86 22  
Email: [mariya.asparuhova@zmk.unibe.ch](mailto:mariya.asparuhova@zmk.unibe.ch)

**Content:**

**Figure S1.** Morphology of HA-treated ST2 and MC3T3-E1 cells.

**Figure S2.** Mineral deposition capacity of HA-treated ST2 and MC3T3-E1 cells assessed by Alizarin red stain.

**Table S1.** Primer sequences.

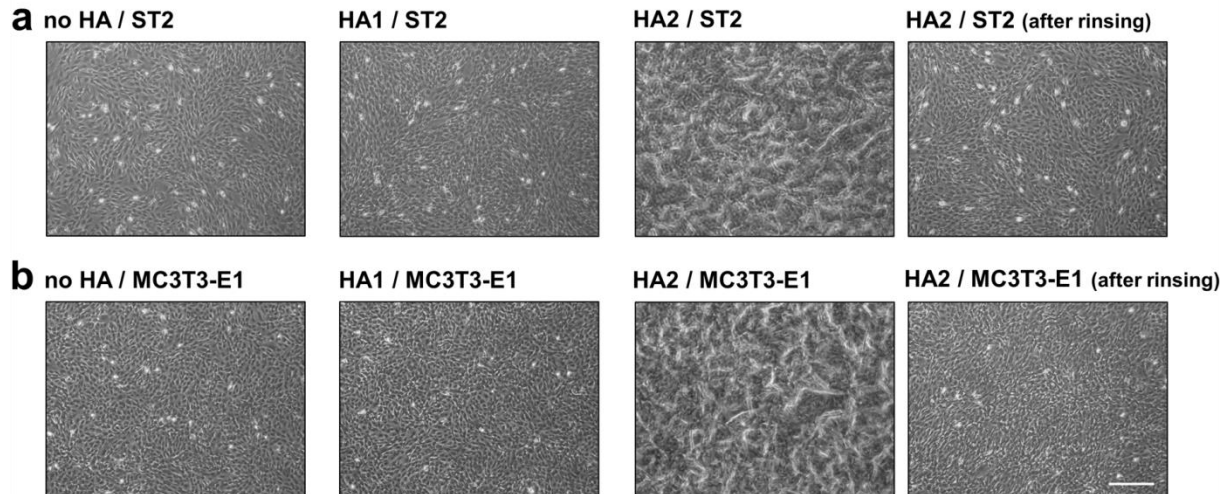

**Fig. S1 Morphology of HA-treated ST2 and MC3T3-E1 cells.** Images of ST2 (**a**) and MC3T3-E1 (**b**) cells seeded on uncoated (left panels, no HA), HA1- or HA2-coated (middle panels) wells. Cells were plated at  $3 \times 10^4$  cells/cm<sup>2</sup> for 24 h before images were taken on a Leica DM IL LED microscope equipped with Leica DFC420 C camera. Both cell types, ST2 and MC3T3-E1, were able to adhere on HA1-coated plates and their morphology did not differ from the morphology of untreated cells seeded on non-coated cell culture plastic (**a** and **b**, compare left with middle panels). In contrast, on HA2-coated plates, cells appeared to adhere solely on the cell culture plastic while HA2 was present in suspension. Images of ST2 and MC3T3-E1 cells plated on HA2-coated wells after rinsing with PBS are shown (**a** and **b**, right panels). Bar, 500  $\mu$ m

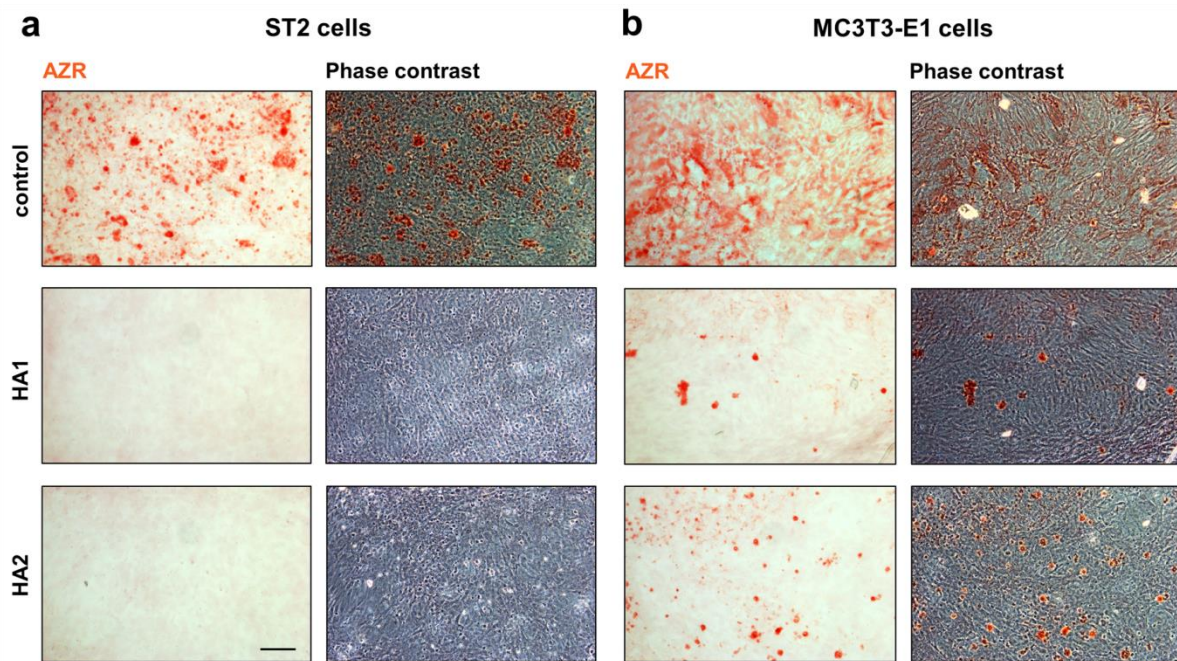

**Fig. S2 Mineral deposition capacity of HA-treated ST2 (a) and MC3T3-E1 (b) cells assessed by Alizarin red stain.** Cells were seeded on uncoated (control), HA1- or HA2-coated wells of 8-well chamber slides (ThermoFisher Scientific, Reinach, Switzerland) in osteogenic media at a density of  $3 \times 10^4$  cells/cm<sup>2</sup>. After 21 days, cells were fixed in 96 % ethanol for 15 min and stained with 0.2 % Alizarin Red S (AZR)(Sigma-Aldrich, Basel, Switzerland), pH 6.4 at room temperature for 1 h. Images (including phase contrast) were acquired on an Olympus BX-51. Representative images of the staining in each of the experimental groups are shown. Scale bar, 500  $\mu$ m.

## Clinical Oral Investigations

**Table S1 Primer Sequences**

| <b>Gene symbol</b> | <b>Gene bank accession number</b> | <b>Primer pair (fwd/rev)</b>                                    | <b>Amplicon size (bp)</b> |
|--------------------|-----------------------------------|-----------------------------------------------------------------|---------------------------|
| Bmp2               | NM_007553                         | 5' -GGGACCCGCTGTCTTCTAGT-3'<br>5' -TCAACTCAAATTCGCTGAGGAC-3'    | 154                       |
| Bmp4               | NM_007554                         | 5' -TTCCTGGTAACCGAATGCTGA-3'<br>5' -CCTGAATCTCGGCGACTTTTT-3'    | 114                       |
| Bmp7               | NM_007557                         | 5' -CCTGTCCATCTTAGGGTTGCC-3'<br>5' -GGCCTTGTAGGGGTAGGAGA-3'     | 151                       |
| Tgfb1              | NM_011577                         | 5' -CTTCAATACGTCAGACATTCGGG-3'<br>5' -GTAACGCCAGGAATTGTTGCTA-3' | 142                       |
| Fgf1               | NM_010197                         | 5' -CCCTGACCGAGAGGTTCAAC-3'<br>5' -GTCCCTTGTCCCATCCACG-3'       | 122                       |
| Sox2               | NM_011443                         | 5' -CCCACCTACAGCATGTCCTAC-3'<br>5' -GCCTCGGACTTGACCACAG-3'      | 83                        |
| Yap1               | NM_001171147                      | 5' -TACTGATGCAGGTA CTGCGG-3'<br>5' -TCAGGGATCTCAAAGGAGGAC-3'    | 180                       |
| Bmi1               | NM_007552                         | 5' -ATCCCCACTTAATGTGTGTCCT-3'<br>5' -CTTGCTGGTCTCCAAGTAACG-3'   | 116                       |
| Ctgf               | NM_010217                         | 5' -GGGCCTCTTCTGCGATTTTC-3'<br>5' -ATCCAGGCAAGTGCATTGGTA-3'     | 151                       |
| Ccnd1              | NM_007631.2                       | 5' -AGAAGTGCGAAGAGGAGGTC-3'<br>5' -AGTTCCATTTGCAGCAGCTC-3'      | 213                       |
| Dkk1               | NM_010051                         | 5' -CAGTGCCACCTTGA ACTCAGT-3'<br>5' -CCGCCCTCATAGAGAACTCC-3'    | 129                       |
| Apc                | NM_007462                         | 5' -CCCCGGAGTGAAACTACGC-3'<br>5' -GGGGACAGGACTGCATTCTC-3'       | 97                        |
| Gsk3b              | NM_019827                         | 5' -TGGCAGCAAGGTAACACAG-3'<br>5' -CGGTTCTTAAATCGCTTGTCTG-3'     | 189                       |
